# Supplementary material for: Collation and analyses of DNA-binding protein domain families from sequence and structural databanks
Source: Royal Society of Chemistry journal article supplement (doi:10.1039/c4mb00629a), 2015-01-27
Supplement: c4mb00629a1.pdf [file c4mb00629a1.pdf]

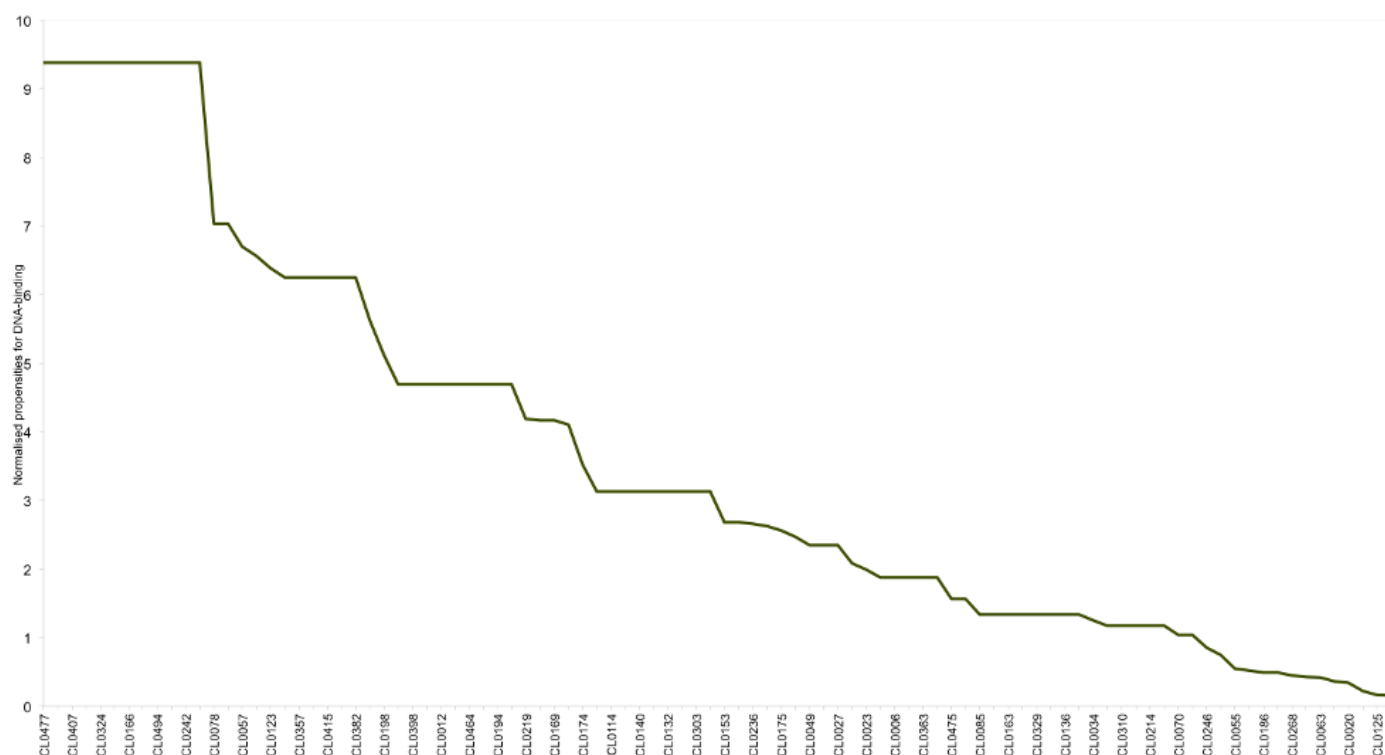

Figure S1: Clan distribution of DNA-binding families

Normalized propensities for occurrence of DNA-binding families in each of the 96 Pfam clans.

(CL0477,CL0073,CL0407,CL0481,CL0324,CL0081,CL0166,CL0410,CL0494,CL0388,CL0242,CL0018,CL0078,CL0469,CL0057,CL0060,CL0123,CL0405,CL0357,CL0359,CL0415,CL0274,CL0382,CL0306,CL0198,CL0446,CL0398,CL0189,CL0012,CL0243,CL0464,CL0156,CL0194,CL0441,CL0219,CL0263,CL0169,CL0361,CL0174,CL0371,CL0114,CL0426,CL0140,CL0438,CL0132,CL0304,CL0303,CL0248,CL0153,CL0021,CL0236,CL0167,CL0175,CL0229,CL0049,CL0349,CL0027,CL0144,CL0023,CL0526,CL0006,CL0366,CL0363,CL0368,CL0475,CL0319,CL0085,CL0362,CL0163,CL0413,CL0329,CL0065,CL0136,CL0280,CL0034,CL0109,CL0310,CL0479,CL0214,CL0128,CL0070,CL0247,CL0246,CL0029,CL0055,CL0032,CL0186,CL0266,CL0268,CL0051,CL0063,CL0039,CL0020,CL0172,CL0125,CL0159)

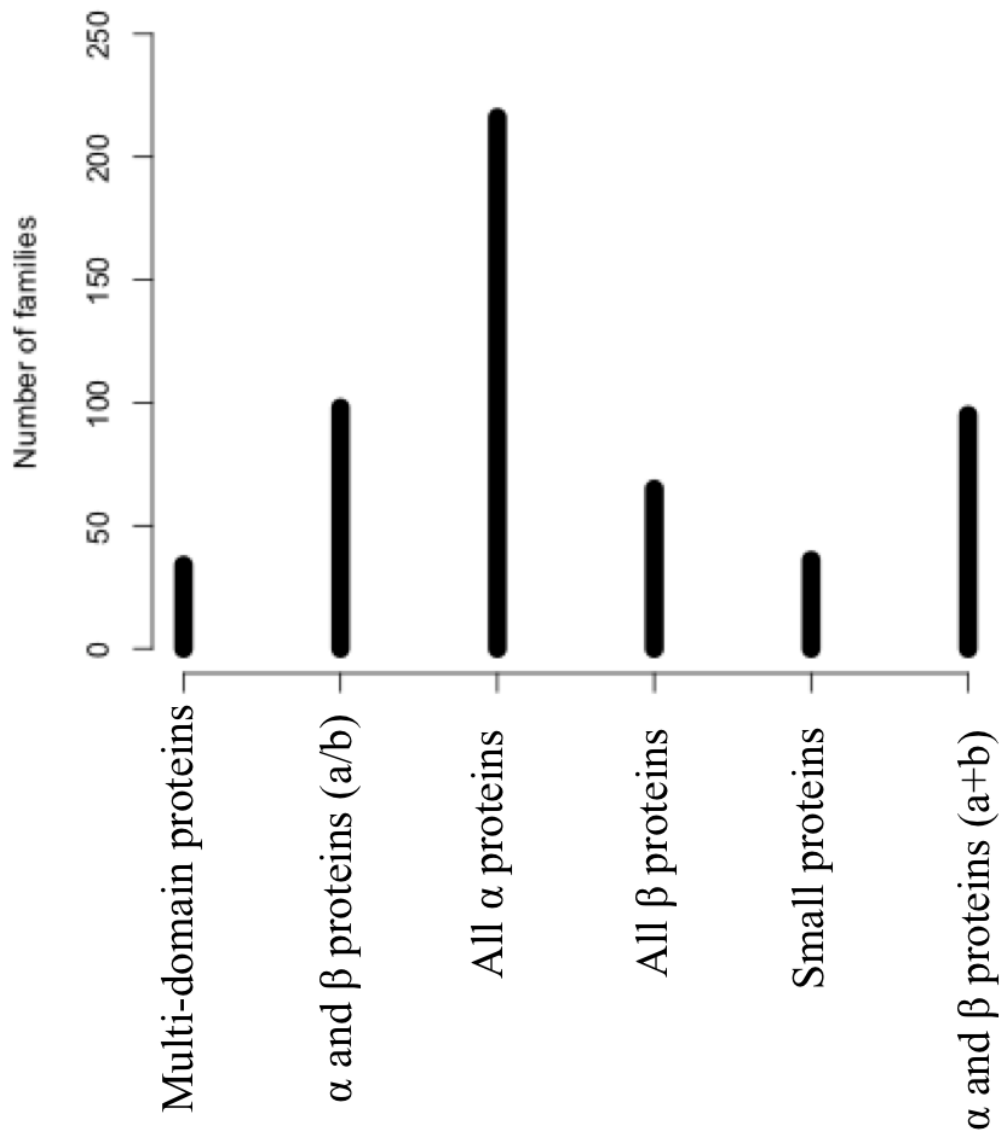

Figure S2: Distribution of DBP families in SCOP classes.

The DNA-binding families were mapped to structures using SCOP database. The all-helical class was observed to be most populated.

Table S1: List of archaeal families with their functions.

| <b>Pfam ID</b> | <b>Pfam Name</b> | <b>Function</b>                       |
|----------------|------------------|---------------------------------------|
| PF02294        | 7kD_DNA_binding  | DNA stability                         |
| PF07381        | DUF1495          | Putative transcription regulator      |
| PF13010        | pRN1_helical     | Primase                               |
| PF11520        | Cren7            | DNA stability and packaging           |
| PF09061        | Stirrup          | Endonuclease                          |
| PF12136        | RNA_pol_Rpo13    | DNA-dependent RNA polymerase          |
| PF09062        | Endonuc_subdom   | Endonuclease                          |
| PF09658        | Cas_Csx9         | DNA repair, chromosomal rearrangement |
| PF09153        | DUF1938          | DNA stability                         |

Table S2: List of viral families with their descriptions.

| <b>Pfam ID</b> | <b>Pfam Name</b> | <b>Pfam Description</b>                                             |
|----------------|------------------|---------------------------------------------------------------------|
| PF03396        | Pox_RNA_pol_35   | Poxvirus DNA-directed RNA polymerase, 35 kD subunit                 |
| PF09266        | VirDNA-topo-I_N  | Viral DNA topoisomerase I, N-terminal                               |
| PF02282        | Herpes_UL42      | DNA polymerase processivity factor (UL42)                           |
| PF08724        | Rep_N            | Rep protein catalytic domain like                                   |
| PF02703        | Adeno_E1A        | Early E1A protein                                                   |
| PF06284        | Cytomega_UL84    | Cytomegalovirus UL84 protein                                        |
| PF04767        | Pox_F17          | DNA-binding 11 kDa phosphoprotein                                   |
| PF05435        | Phi-29_GP3       | Phi-29 DNA terminal protein GP3                                     |
| PF09198        | T4-Gluco-transf  | Bacteriophage T4 beta-glucosyltransferase                           |
| PF01606        | Arteri_env       | Arterivirus envelope protein                                        |
| PF00844        | Gemini_coat      | Geminivirus coat protein/nuclear export factor BR1 family           |
| PF05941        | Chordopox_A20R   | Chordopoxvirus A20R protein                                         |
| PF03728        | Viral_DNA_Zn_bi  | Viral DNA-binding protein, zinc binding domain                      |
| PF04523        | Herpes_U30       | Herpes virus tegument protein U30                                   |
| PF11729        | Capsid-VNN       | Nodavirus capsid protein                                            |
| PF11056        | UvsY             | Recombination, repair and ssDNA binding protein UvsY                |
| PF05311        | Baculo_PP31      | Baculovirus 33KDa late protein (PP31)                               |
| PF08994        | T4_Gp59_C        | T4 gene Gp59 loader of gp41 DNA helicase C-term                     |
| PF11590        | DNAPolymera_Pol  | DNA polymerase catalytic subunit Pol                                |
| PF03355        | Pox_TAP          | Viral Trans-Activator Protein                                       |
| PF00906        | Hepatitis_core   | Hepatitis core antigen                                              |
| PF12149        | HSV_VP16_C       | Herpes simplex virus virion protein 16 C terminal                   |
| PF06385        | Baculo_LEF-11    | Baculovirus LEF-11 protein                                          |
| PF03044        | Herpes_UL16      | Herpesvirus UL16/UL94 family                                        |
| PF03041        | Baculo_LEF-2     | lef-2                                                               |
| PF05464        | Phi-29_GP4       | Phi-29-like late genes activator (early protein GP4)                |
| PF05505        | Ebola_NP         | Ebola nucleoprotein                                                 |
| PF05864        | Chordopox_RPO7   | Chordopoxvirus DNA-directed RNA polymerase 7 kDa polypeptide (RPO7) |
| PF01736        | Polyoma_agno     | Polyomavirus agnoprotein                                            |
| PF04726        | Microvir_J       | Microvirus J protein                                                |
| PF00508        | PPV_E2_N         | E2 (early) protein, N terminal                                      |
| PF09158        | MotCF            | Bacteriophage T4 MotA, C-terminal                                   |
| PF08684        | ocr              | DNA mimic ocr                                                       |
| PF00336        | DNA_pol_viral_C  | DNA polymerase (viral) C-terminal domain                            |
| PF04735        | Baculo_helicase  | Baculovirus DNA helicase                                            |
| PF04929        | Herpes_DNAp_acc  | Herpes DNA replication accessory factor                             |
| PF05320        | Pox_RNA_Pol_19   | Poxvirus DNA-directed RNA polymerase 19 kDa subunit                 |
| PF05784        | Herpes_UL82_83   | Betaherpesvirus UL82/83 protein N terminus                          |
| PF08408        | DNA_pol_B_3      | DNA polymerase family B viral insert                                |
| PF00898        | Orbi_VP2         | Orbivirus outer capsid protein VP2                                  |

|         |                 |                                                             |
|---------|-----------------|-------------------------------------------------------------|
| PF09625 | VP9             | VP9 protein                                                 |
| PF04498 | Pox_VP8_L4R     | Poxvirus nucleic acid binding protein VP8/L4R               |
| PF01659 | Luteo_Vpg       | Luteovirus putative VPg genome linked protein               |
| PF12415 | rpo132          | Poxvirus DNA dependent RNA polymerase                       |
| PF02459 | Adeno_terminal  | Adenoviral DNA terminal protein                             |
| PF02442 | L1R_F9L         | Lipid membrane protein of large eukaryotic DNA viruses      |
| PF00424 | REV             | REV protein (anti-repression trans-activator protein)       |
| PF05459 | Herpes_UL69     | Herpesvirus transcriptional regulator family                |
| PF01696 | Adeno_E1B_55K   | Adenovirus EB1 55K protein / large t-antigen                |
| PF02959 | Tax             | HTLV Tax                                                    |
| PF00242 | DNA_pol_viral_N | DNA polymerase (viral) N-terminal domain                    |
| PF11634 | IPI_T4          | Nuclease inhibitor from bacteriophage T4                    |
| PF12410 | rpo30_N         | Poxvirus DNA dependent RNA polymerase 30kDa subunit         |
| PF04941 | LEF-8           | Late expression factor 8 (LEF-8)                            |
| PF05892 | Tricho_coat     | Trichovirus coat protein                                    |
| PF01785 | Closter_coat    | Closterovirus coat protein                                  |
| PF01787 | Ilar_coat       | Ilarvirus coat protein                                      |
| PF12818 | Tegument_dsDNA  | dsDNA viral tegument protein                                |
| PF03585 | Herpes_ICP4_C   | Herpesvirus ICP4-like protein C-terminal region             |
| PF03584 | Herpes_ICP4_N   | Herpesvirus ICP4-like protein N-terminal region             |
| PF03581 | Herpes_UL33     | Herpesvirus UL33-like protein                               |
| PF03580 | Herpes_UL14     | Herpesvirus UL14-like protein                               |
| PF04441 | Pox_VERT_large  | Poxvirus early transcription factor (VETF), large subunit   |
| PF12524 | GlyL_C          | dsDNA virus glycoprotein L C terminal                       |
| PF11123 | DNA_Packaging_2 | DNA packaging protein                                       |
| PF06931 | Adeno_E4_ORF3   | Mastadenovirus E4 ORF3 protein                              |
| PF07230 | Phage_T4_Gp20   | Bacteriophage T4-like capsid assembly protein (Gp20)        |
| PF04838 | Baculo_LEF5     | Baculoviridae late expression factor 5                      |
| PF05847 | Baculo_LEF-3    | Nucleopolyhedrovirus late expression factor 3 (LEF-3)       |
| PF02304 | Phage_B         | Scaffold protein B                                          |
| PF11418 | Scaffolding_pro | Phi29 scaffolding protein                                   |
| PF00740 | Parvo_coat      | Parvovirus coat protein VP2                                 |
| PF08452 | DNAP_B_exo_N    | DNA polymerase family B exonuclease domain, N-terminal      |
| PF08456 | Vmethyltransf_C | Viral methyltransferase C-terminal                          |
| PF03324 | Herpes_HEPA     | Herpesvirus DNA helicase/primase complex associated protein |
| PF09593 | Pathogen_betaC1 | Beta-satellite pathogenicity beta C1 protein                |
| PF02236 | Viral_DNA_bi    | Viral DNA-binding protein, all alpha domain                 |
| PF11246 | Phage_gp53      | Base plate wedge protein 53                                 |
| PF09214 | Prd1-P2         | Bacteriophage Prd1, adsorption protein P2                   |
| PF11050 | Viral_env_E26   | Virus envelope protein E26                                  |
| PF09010 | AsiA            | Anti-Sigma Factor A                                         |
| PF03293 | Pox_RNA_pol     | Poxvirus DNA-directed RNA polymerase, 18 kD subunit         |

|         |                 |                                                          |
|---------|-----------------|----------------------------------------------------------|
| PF01499 | Herpes_UL25     | Herpesvirus UL25 family                                  |
| PF05273 | Pox_RNA_Pol_22  | Poxvirus RNA polymerase 22 kDa subunit                   |
| PF03052 | Adeno_52K       | Adenoviral protein L1 52/55-kDa                          |
| PF03274 | Foamy_BEL       | Foamy virus BEL 1/2 protein                              |
| PF00511 | PPV_E2_C        | E2 (early) protein, C terminal                           |
| PF02905 | EBV-NA1         | Epstein Barr virus nuclear antigen-1, DNA-binding domain |
| PF04623 | Adeno_E1B_55K_N | Adenovirus E1B protein N-terminus                        |
| PF11053 | DNA_Packaging   | Terminase DNA packaging enzyme                           |
| PF11637 | UvsW            | ATP-dependant DNA helicase UvsW                          |

Table S3: List of nine fungi-specific DNA-binding families with their functions.

| <b>Pfam ID</b> | <b>Pfam Name</b> | <b>Function</b>                 |
|----------------|------------------|---------------------------------|
| F09462         | Mus7             | DNA repair                      |
| PF12658        | Ten1             | Telomere capping                |
| PF09197        | Rap1-DNA-bind    | DNA binding                     |
| PF09441        | Abp2             | Cell cycle regulation           |
| PF04769        | MAT_Alpha1       | Transcription activator         |
| PF03930        | Flp_N            | Recombinase                     |
| PF12659        | Stn1_C           | Telomere capping                |
| PF10680        | RRN9             | Transcription initiation factor |
| PF02200        | STE              | Transcription factor            |

Table S4: List of 50 metazoan DNA-binding families.

| <b>Pfam ID</b> | <b>Pfam Name</b> | <b>Pfam Description</b>                                      |
|----------------|------------------|--------------------------------------------------------------|
| PF02946        | GTF2I            | GTF2I-like repeat                                            |
| PF09121        | Tower            | Tower                                                        |
| PF09047        | MEF2_binding     | MEF2 binding                                                 |
| PF09292        | Neil1-DNA_bind   | Endonuclease VIII-like 1, DNA bind                           |
| PF04487        | CITED            | CITED                                                        |
| PF11825        | Nuc_recep-AF1    | Nuclear/hormone receptor activator site AF-1                 |
| PF10195        | Phospho_p8       | DNA-binding nuclear phosphoprotein p8                        |
| PF07545        | Vg_Tdu           | Vestigial/Tondu family                                       |
| PF07815        | Abi_HHR          | Abl-interactor HHR                                           |
| PF03165        | MH1              | MH1 domain                                                   |
| PF08474        | MYT1             | Myelin transcription factor 1                                |
| PF01586        | Basic            | Myogenic determination factor 5                              |
| PF04732        | Filament_head    | Intermediate filament head (DNA binding) region              |
| PF04731        | Caudal_act       | Caudal like protein activation region                        |
| PF05044        | Prox1            | Homeobox prospero-like protein (PROX1)                       |
| PF06529        | Vert_IL3-reg_TF  | Vertebrate interleukin-3 regulated transcription factor      |
| PF04814        | HNF-1_N          | Hepatocyte nuclear factor 1 (HNF-1), N terminus              |
| PF09038        | 53-BP1_Tudor     | Tumour suppressor p53-binding protein-1 Tudor                |
| PF09033        | DFE-C            | DNA Fragmentation factor 45kDa, C terminal domain            |
| PF12940        | RAG1             | Recombination-activation protein 1 (RAG1)                    |
| PF10264        | Stork_head       | Winged helix Storkhead-box1 domain                           |
| PF00157        | Pou              | Pou domain - N-terminal to homeobox domain                   |
| PF06959        | RecQ5            | RecQ helicase protein-like 5 (RecQ5)                         |
| PF04589        | RFX1_trans_act   | RFX1 transcription activation region                         |
| PF12885        | TORC_M           | Transducer of regulated CREB activity middle domain          |
| PF11509        | Telomere_Pot1    | Protection of telomeres protein POT1                         |
| PF00859        | CTF_NFI          | CTF/NF-I family transcription modulation region              |
| PF04988        | AKAP95           | A-kinase anchoring protein 95 (AKAP95)                       |
| PF14048        | MBD_C            | C-terminal domain of methyl-CpG binding protein 2 and 3      |
| PF00751        | DM               | DM DNA binding domain                                        |
| PF13922        | PHD_3            | Double-sex mab3 related transcription factor 1               |
| PF07443        | HARP             | PHD domain of transcriptional enhancer, Asx                  |
| PF10491        | Nrf1_DNA-bind    | HepA-related protein (HARP)                                  |
| PF12374        | Dmrt1            | NLS-binding and DNA-binding and dimerisation domains of Nrf1 |
| PF12203        | HDAC4_Gln        | Glutamine rich N terminal domain of histone deacetylase 4    |
| PF08188        | Protamine_3      | Spermatozal protamine family                                 |
| PF02165        | WT1              | Wilm's tumour protein                                        |



|         |                 |                                                                  |
|---------|-----------------|------------------------------------------------------------------|
| PF02166 | Androgen_recep  | Androgen receptor                                                |
| PF10426 | zf-RAG1         | Recombination-activating protein 1 zinc-finger domain            |
| PF01530 | zf-C2HC         | Zinc finger, C2HC type                                           |
| PF04704 | Zfx_Zfy_act     | Zfx / Zfy transcription activation region                        |
| PF10524 | Nfi_DNAbd_pre-N | Nuclear factor I protein pre-N-terminus                          |
| PF02944 | BESS            | BESS motif                                                       |
| PF13866 | zf-SAP30        | SAP30 zinc-finger                                                |
| PF11600 | CAF-1_p150      | Chromatin assembly factor 1 p150 subunit                         |
| PF08599 | Nbs1_C          | DNA damage repair protein Nbs1                                   |
| PF10683 | DBD_Tnp_Hermes  | Hermes transposase DNA-binding domain                            |
| PF04621 | ETS_PEA3_N      | PEA3 subfamily ETS-domain transcription factor N terminal domain |
| PF12743 | ESR1_C          | Oestrogen-type nuclear receptor final C-terminal                 |
| PF02155 | GCR             | Glucocorticoid receptor                                          |

Table S5: DNA-binding Pfam families mapped to SCOP superfamilies.

| <b>SCOP superfamily</b> | <b>Pfam families mapped</b>                                                                                                                                                                                                                                                                                                                                                                                                                                                                                                |
|-------------------------|----------------------------------------------------------------------------------------------------------------------------------------------------------------------------------------------------------------------------------------------------------------------------------------------------------------------------------------------------------------------------------------------------------------------------------------------------------------------------------------------------------------------------|
| a.4.5                   | Arg_repressor HTH_1 HTH_11 PadR RTP E2F_TDP Fork_head<br>TFIIE_beta RFX_DNA_binding RPA_C Cdc6_C HTH_24<br>HTH_Crp_2 MarR_2 MarR Ets Rep_3 HSF_DNA-bind<br>Linker_histone GntR Crp RuvB_C HTH_27 LexA_DNA_bind<br>Pox_D5 HTH_20 HTH_5 HTH_IclR SelB-wing_3 FUR<br>Fe_dep_repress z-alpha RQC PuR_N Pencillinase_R IBD HTH_34<br>HTH_9 HrcA_DNA-bdg Tn7_Tnp_TnsA_C DsrD HTH_23 HTH_28<br>HTH_29 HxlR Rio2_N HTH_CodY HTH_AsnC-type HTH_DeoR<br>Put_DNA-bind_N FokI_N FokI_C IRF SelB-wing_1 SelB-wing_2<br>Ftsk_gamma F-112 |
| c.37.1                  | DNA_pol3_delta2 SMC_N AAA_19 DEAD ResIII Helicase_C UvrB<br>AAA_25 AAA DnaB_C T4SS-DNA_transf TraG-D_C<br>TrwB_AAD_bind SNF2_N Bac_DnaA NTPase_1 RuvB_N<br>Sigma54_activat TIP49 DNA_pol3_delta PolC_DP2 Rad51 RecA<br>AAA_11 UvrD_C Exonuc_V_gamma UvrD_C_2 PPV_E1_C<br>SecA_DEAD Viral_helicase1 MutS_V DEAD_2 AAA_27                                                                                                                                                                                                    |
| a.4.1                   | Homeobox Homeobox_KN HTH_18 HTH_AraC HTH_8 Myb_DNA-<br>bind_2 HTH_23 HTH_7 Myb_DNA-bind_6 Myb_DNA-binding<br>CENP-B_N HTH_24 MarR_2 HTH_Tnp_Tc5 Rap1-DNA-bind<br>HTH_28 TetR_N PAX Prox1 SLIDE Mor HTH_Tnp_Tc3_1<br>HTH_Tnp_Tc3_2 HTH_30 Myb_DNA-bind_5 SWIRM HTH_psq<br>Homez HTH_Tnp_Mu_2 HTH_Tnp_Mu_1 HTH_Tnp_1 HTH_6                                                                                                                                                                                                   |
| c.52.1                  | YqaJ MutH BamHI Endonuc-BglII Bse634I EcoRI RestrictionMunI<br>Endonuc-BsobI NaeI NgoMIV_restric Hjc ERCC4 Phage_endo_I<br>EcoRII-C Endonuc-MspI Endonuc-EcoRV Tn7_Tnp_TnsA_N Vsr<br>Mrr_cat Rad10 Endonuc-FokI_C Endonuc-HincII XisH Endonuc-<br>PvuII                                                                                                                                                                                                                                                                    |
| a.35.1                  | HTH_19 HTH_25 HTH_26 HTH_31 HTH_3 Pou HNF-1_N HTH_35<br>HTH_23 LacI HTH_37 DUF1870 CUT Phage_CII Cro HTH_11                                                                                                                                                                                                                                                                                                                                                                                                                |
| e.29.1                  | RNA_pol_Rpb2_1 RNA_pol_Rpb2_2 RNA_pol_Rpb2_3<br>RNA_pol_Rpb2_45 RNA_pol_Rpb2_6 RNA_pol_Rpb2_7<br>RNA_pol_Rpb1_1 RNA_pol_Rpb1_2 RNA_pol_Rpb1_3<br>RNA_pol_Rpb1_4 RNA_pol_Rpb1_5 RNA_pol_Rpb1_6<br>RNA_pol_Rpb1_7 RNA_pol_Rpb2_4 RNA_pol_Rpb2_5                                                                                                                                                                                                                                                                              |
| b.40.4                  | Rho_RNA_bind tRNA_anti CSD DNA_ligase_OB Phage_DNA_bind<br>BRCA-2_OB1 Telo_bind TEBP_beta Rep_fac-A_C RecO_N<br>DNA_ligase_A_C gp32 TIP49 Rep_fac-A_3                                                                                                                                                                                                                                                                                                                                                                      |
| c.55.3                  | rve DNA_pol_B_exo1 RNase_H Ydc2-catalyt DNA_pol_A_exo1<br>DDE_Tnp_1 Dimer_Tnp_Tn5 Taq-exonuc DNA_pol_B_exo2 NurA<br>DNA_pol_B_2 Exonuc_X-T_C                                                                                                                                                                                                                                                                                                                                                                               |
| a.4.6                   | GerE HTH_23 HTH_24 HTH_38 Sigma70_r4_2 Sigma70_r4<br>Spo0A_C HTH_10 Trans_reg_C                                                                                                                                                                                                                                                                                                                                                                                                                                            |

| <b>SCOP superfamily</b> | <b>Pfam families mapped</b>                                                                     |
|-------------------------|-------------------------------------------------------------------------------------------------|
| d.131.1                 | DNA_PPF gp45-slide_C Herpes_UL42 PCNA_N PCNA_C<br>DNA_pol3_beta DNA_pol3_beta_2 DNA_pol3_beta_3 |
| b.2.5                   | RHD STAT_bind Runt T-box NDT80_PhoG CEP1-DNA_bind P53<br>LAG1-DNAbind                           |
| e.8.1                   | DNA_pol_B IMS_HHH IMS RNA_pol DNA_pol_A DNA_pol_B_2<br>RVT_1 RVT_thumb                          |
| a.4.13                  | Sigma70_r4 Sigma70_r3 HTH_23 Sigma70_ECF Sigma70_r4_2<br>HTH_11 HTH_38                          |
| c.66.1                  | N6_N4_Mtase DNA_methylase MethyltransfD12 HsdM_N N6_Mtase<br>DUF519 Eco57I                      |
| a.6.1                   | HTH_17 Phage_Nu1 MerR_1 MerR-DNA-bind MerR<br>HTH_Tnp_Mu_1 Exc                                  |
| g.37.1                  | zf-C2H2_4 zf-C2H2 zf-C2H2_2 zf-C2H2_6 zf-RAG1 GAGA zf-BED                                       |
| g.39.1                  | zf-FPG IleRS zf-C4 zf-AD Neil1-DNA_bind zf-FCS THAP GATA                                        |
| a.43.1                  | Arc MetJ Omega_Repress ParG RHH_1 SeqA DUF1778                                                  |
| a.60.2                  | HHH Transposase_20_5_3 exonuc DNA_ligase ZBD HHH_2 HHH_3                                        |
| d.4.1                   | Endonuclease_7 Endonuclease_NS HNH_3 NUMOD4 Colicin-DNase<br>Endonuclease_1                     |
| d.89.1                  | PPV_E1_C Gemini_AL1 Rep_N TrwC_T_Ag DNA_bind                                                    |
| d.95.2                  | Endonuc_subdom Hom_end HTH_WhiA LAGLIDADG_1<br>LAGLIDADG_2                                      |
| a.60.4                  | DNA_pol_lambd_f HHH_2 HHH_3 HHH IMS_HHH                                                         |
| a.80.1                  | DNApol3-delta_C Rep_fac_C DNA_pol3_gamma3 RFC1 MgsA_C                                           |
| a.121.1                 | TetR_C_5 TetR_C WHG TetR_C_6                                                                    |
| d.10.1                  | Integrase_DNA AP2 MBD Phage_integ_N                                                             |
| g.44.1                  | zf-C3HC4 zf-RING_2 zf-Nse ZZ                                                                    |
| a.96.1                  | HHH EndIII_4Fe-2S DUF1886 Adenine_glyco                                                         |
| a.4.14                  | KorB HTH_23 HTH_38 HTH_3                                                                        |
| d.14.1                  | DNA_mis_repair DNA_gyraseB Topo-VIb_trans                                                       |
| d.142.2                 | DNA_ligase_A MRNA_ligase DNA_ligase_aden                                                        |
| a.22.1                  | Histone TAF Bromo_TP                                                                            |
| e.13.1                  | DnaB_bind Toprim_N Toprim                                                                       |
| d.163.1                 | Phage_integrase Topoisom_I Flp_C                                                                |
| b.121.5                 | Parvo_coat Phage_G Phage_F                                                                      |
| d.129.1                 | TBP OGG_N AlkA_N                                                                                |
| a.60.9                  | Phage_integr_N2 Phage_integr_N Flp_N                                                            |
| b.26.1                  | IRF-3 MH2 FtsK_SpoIIIE_N                                                                        |
| g.41.3                  | zf-CHC2 TF_Zn Ribbon TFIIS_C                                                                    |
| c.120.1                 | 5_3_exonuc_N XPG_I XPG_N                                                                        |
| a.120.1                 | T4_Gp59_C T4_Gp59_N                                                                             |
| a.60.12                 | DNA_pol_lambd_f HHH_3                                                                           |
| c.93.1                  | Peripla_BP_1 Peripla_BP_3                                                                       |

| <b>SCOP superfamily</b> | <b>Pfam families mapped</b> |
|-------------------------|-----------------------------|
| a.113.1                 | MutS_III MutS_IV            |
| a.32.1                  | TFIIA_TFIIA_gamma_N         |
| a.55.1                  | Bac_DNA_binding_Tra_M       |
| d.58.8                  | EBV-NA1_PPV_E2_C            |
| a.267.1                 | HTH_24_HTH_AsnC-type        |
| a.78.1                  | FadR_C_FCD                  |
| a.38.1                  | HLH_Myc-LZ                  |
| b.142.1                 | EcoRII-N_B3                 |
| b.56.1                  | TFIIA_TFIIA_gamma_C         |
| e.10.1                  | Topoisom_bac_Toprim         |
| a.118.1                 | MIF4G_DNA_alkylation        |
| b.34.13                 | Chromo_7kD_DNA_binding      |
| c.55.7                  | DUF1938_Methyltransf_1N     |
| b.82.1                  | AraC_binding_Mif2           |
| d.287.1                 | Methylase_S_TaqI_C          |
| d.264.1                 | Prim-Pol_DNA_primase_S      |
| b.131.1                 | Ku_C_Ku                     |
| a.4.12                  | Bac_DnaA_C_Trp_repressor    |
| c.62.1                  | VWA_Ku_N                    |
| e.11.1                  | DNA_topoisoIV_Toprim        |
| b.55.1                  | SSrecog                     |
| d.75.2                  | MutS_I                      |
| a.213.1                 | DinB                        |
| a.4.3                   | ARID                        |
| a.74.1                  | TFIIB                       |
| b.110.1                 | Pyocin_S                    |
| b.113.1                 | Fapy_DNA_glyco              |
| e.12.1                  | TP6A_N                      |
| b.34.7                  | IN_DBD_C                    |
| d.18.1                  | PC4                         |
| c.53.1                  | Resolvase                   |
| a.142.1                 | PRD                         |
| d.380.1                 | zf-CGNR                     |
| a.60.6                  | HHH                         |
| d.3.1                   | Rad4                        |
| a.27.1                  | zf-FPG_IleRS                |
| a.54.1                  | Viral_DNA_bi                |
| e.71.1                  | HHH_3                       |
| g.66.1                  | zf-CCCH                     |
| d.50.1                  | Rad52_Rad22                 |
| c.52.3                  | RNA_pol_Rpb5_N              |
| b.68.10                 | DNA_gyraseA_C               |

| <b>SCOP<br/>superfamily</b> | <b>Pfam families mapped</b> |
|-----------------------------|-----------------------------|
| a.62.1                      | Hepatitis_core              |
| a.34.2                      | HNF-1_N                     |
| c.31.1                      | SIR2                        |
| a.5.1                       | RuvA_C                      |
| b.42.7                      | BTB                         |
| b.69.4                      | WD40                        |
| a.171.1                     | Tower                       |
| g.53.1                      | zf-TAZ                      |
| c.126.1                     | DNA_III_psi                 |
| a.60.8                      | HRDC                        |
| g.41.9                      | DNA_RNAPol_7kD              |
| d.217.1                     | SAND                        |
| a.49.1                      | Phage-MuB_C                 |
| c.136.1                     | Toprim                      |
| e.49.1                      | Toprim                      |
| g.51.1                      | Viral_DNA_Zn_bi             |
| a.270.1                     | DBD_Tnp_Hermes              |
| d.304.1                     | UPF0150                     |
| a.146.1                     | TRF                         |
| g.85.1                      | zf-HIT                      |
| d.343.1                     | PRiA4_ORF3                  |
| d.68.6                      | Alba                        |
| d.199.1                     | MotCF                       |
| a.235.1                     | DNA_ligase_A_N              |
| d.268.1                     | ParBc                       |
| c.55.6                      | MutS_II                     |
| g.91.1                      | E7                          |
| b.68.9                      | US22                        |
| c.18.1                      | UDG                         |
| d.240.1                     | IMS_C                       |
| d.228.1                     | SeqA                        |
| d.57.1                      | DinI                        |
| b.38.5                      | Regulator_TrmB              |
| b.43.5                      | CTP-dep_RFKase              |
| g.72.1                      | SBP                         |
| d.222.1                     | YbaB_DNA_bd                 |
| a.140.2                     | SAP                         |
| c.1.9                       | TatD_DNase                  |
| e.2.1                       | Ter                         |
| a.60.3                      | RNA_pol_A_CTD               |
| a.47.1                      | STAT_alpha                  |
| d.61.1                      | 2H-phosphodiester           |

| <b>SCOP<br/>superfamily</b> | <b>Pfam families mapped</b> |
|-----------------------------|-----------------------------|
| a.118.19                    | Ku_PK_bind                  |
| a.179.1                     | Inhibitor_G39P              |
| d.283.1                     | PmbA_TldD                   |
| d.79.6                      | RusA                        |
| a.18.1                      | Pyr_excise                  |
| g.62.1                      | DM                          |
| g.38.1                      | Zn_clus                     |
| c.28.1                      | DNA_photolyase              |
| d.136.1                     | Regulator_TrmB              |
| b.82.4                      | AraC_binding                |
| d.215.1                     | SMC_hinge                   |
| d.320.1                     | DisA_N                      |
| d.88.1                      | SRF-TF                      |
| c.23.1                      | Response_reg                |
| a.5.4                       | TFIIS_M                     |
| b.35.2                      | CAT_RBD                     |
| g.41.18                     | TF_Zn_Ribbon                |
| b.82.3                      | cNMP_binding                |
| d.247.1                     | MC1                         |
| b.126.1                     | Prd1-P2                     |
| d.74.2                      | Arg_repressor_C             |
| a.140.5                     | EIN3                        |
| d.236.1                     | Sigma70_r4                  |
| b.86.1                      | Hom_end_hint                |
| b.59.1                      | XRCC4                       |
| b.143.1                     | NAM                         |
| a.60.5                      | BAF                         |
| c.87.1                      | T4-Gluco-transf             |
| d.48.1                      | RecA                        |
| a.124.1                     | S1-P1_nuclease              |
| a.140.4                     | Endonuc-dimeris             |
| d.17.4                      | VirB8                       |
| d.239.1                     | GCM                         |
| a.37.1                      | bZIP_Maf                    |
| b.121.3                     | Nucleoplasmin               |
| a.145.1                     | FlhD                        |
| a.187.1                     | HAND                        |
| d.186.1                     | gpW                         |
| a.60.7                      | 5_3_exonuc                  |
| d.306.1                     | PhdYeFM_antitox             |
| a.76.1                      | Fe_dep_repr_C               |
| b.34.9                      | 53-BP1_Tudor                |

| <b>SCOP<br/>superfamily</b> | <b>Pfam families mapped</b> |
|-----------------------------|-----------------------------|
| b.46.1                      | Pur_DNA_glyco               |
| d.295.1                     | Tbf5                        |
| d.135.1                     | HORMA                       |
| d.58.57                     | Y1_Tnp                      |
| d.50.3                      | Stirrup                     |
| d.58.4                      | AsnC_trans_reg              |
| a.159.3                     | ocr                         |
| b.34.17                     | YccV-like                   |
| a.237.1                     | DNA_pol3_theta              |
| d.292.1                     | MutL_C                      |
| b.34.12                     | BAH                         |
| a.99.1                      | FAD_binding_7               |
| d.288.1                     | GTF2I                       |
| a.155.1                     | Histone_HNS                 |
| g.48.1                      | Ada_Zn_binding              |
| g.45.1                      | RecO_C                      |
| e.63.1                      | DP                          |
| a.5.6                       | dsDNA_bind                  |
| b.7.5                       | DUF2027                     |
| g.79.1                      | WRKY                        |
| d.180.1                     | Alpha_TIF                   |
| a.275.1                     | DnaB_2                      |
| b.34.21                     | Plus-3                      |
| d.34.1                      | KilA-N                      |
| e.64.1                      | FlhC                        |
| a.81.1                      | DnaB                        |
| a.262.1                     | DNA_primase_lrg             |
| d.68.7                      | R3H                         |
| a.159.5                     | Fe-S_assembly               |
| a.118.8                     | EST1_DNA_bind               |
| c.124.1                     | Sugar-bind                  |
| a.118.16                    | Translin                    |
| a.140.3                     | Rho_N                       |
| d.58.18                     | NikR_C                      |
| g.41.2                      | ADK_lid                     |
| a.236.1                     | DnaG_DnaB_bind              |
| d.121.1                     | VirDNA-topo-I_N             |
| a.34.1                      | SinI                        |
| d.208.1                     | Archease                    |
| a.177.1                     | Sigma70_r2                  |
| g.73.1                      | zf-C2HC                     |
| e.15.1                      | Topoisom_I_N                |

| <b>SCOP<br/>superfamily</b> | <b>Pfam families mapped</b> |
|-----------------------------|-----------------------------|
| b.129.1                     | MraZ                        |
| d.257.1                     | DNase-RNase                 |
| b.91.1                      | PPV_E2_N                    |
| b.121.2                     | Capsid_NCLDV                |
| a.156.1                     | H2TH                        |
| d.151.1                     | Exo_endo_phos               |
| d.326.1                     | XisI                        |
| d.379.1                     | TFIID_90kDa                 |
| a.4.2                       | DNA_binding_1               |
| a.150.1                     | AsiA                        |
| a.241.1                     | Tra_M                       |
| g.47.1                      | Copper-fist                 |
| a.21.1                      | HMG_box                     |
| c.128.1                     | DNA_pol3_chi                |
| d.164.1                     | MH1                         |
| a.4.10                      | Integrase_Zn                |
| d.315.1                     | TRCF                        |
| a.137.14                    | Activator_LAG-3             |
| b.1.18                      | TIG                         |
| a.164.1                     | DFF-C                       |
| a.263.1                     | Phi-29_GP3                  |
